# Supplementary material for: Three-Dimensional Printing of Red Algae Biopolymers: Effect of Locust Bean Gum on Rheology and Processability
Source: MDPI journal article supplement (doi:10.3390/gels10030166), 2024-02-23
Supplement: s1 [file s1]

Supplementary Table S1. Shift factor for viscosity and shear rate to overlap every seaweed extract system to the corresponding system without LBG addition (LBG 0%)

| Seaweed extract    | LBG (%) | viscosity shift factor, $(a_c)_I$ | shear rate shift factor, $(a_c)_{II}$ |
|--------------------|---------|-----------------------------------|---------------------------------------|
| <i>C. crispus</i>  | 0       | 1.00                              | 1.00                                  |
|                    | 0.5     | 2.19                              | 0.40                                  |
|                    | 1       | 8.73                              | 0.10                                  |
|                    | 1.5     | 30.62                             | 0.03                                  |
| <i>G. gracilis</i> | 0       | 1.00                              | 1.00                                  |
|                    | 1.5     | 23.54                             | 1.59                                  |
|                    | 2       | 71.02                             | 1.00                                  |
|                    | 2.5     | 249.76                            | 0.40                                  |
| <i>G. corneum</i>  | 0       | 1.00                              | 1.00                                  |
|                    | 1       | 28.66                             | 0.03                                  |
|                    | 1.5     | 115.16                            | 0.001                                 |
|                    | 2       | 437.39                            | 0.00002                               |
